# Supplementary material for: Towards an Evolutionary Model of Transcription Networks
Source: PLOS journal article supplement (doi:10.1371/journal.pcbi.1002064), 2011-06-09
Supplement: S9 (10.1371/journal.pcbi.1002064.s009) [file journal.pcbi.1002064.s009]

Table S1: Evolutionary models for gene regulatory sequence (S), gene expression (E) and using phylogenetic information (P).

| Model            | Components |   |   | Applications                                              | Species         |
|------------------|------------|---|---|-----------------------------------------------------------|-----------------|
| MAFIA[1]         | P          | S | - | Evolution of binding sites                                | Drosophila      |
| EMMA[2]          | P*         | S | - | CRM alignment and prediction                              | Drosophila      |
| Kimono[3]        | -          | S | E | Clustering of promoter and expression                     | Simulation      |
| MODEM[4]         | -          | S | E | Identifying target genes of a transcription factor        | Yeast           |
| REDUCE[5]        | -          | S | E | Motif prediction                                          | Yeast           |
| DCA[6]           | P          | - | E | Identifying conserved and diverged co-expression patterns | Yeasts          |
| SCSC[7]          | P*         | - | E | Identifying conserved and diverged co-expression patterns | Mammals         |
| Khaitovich[8]    | P          | - | E | Neutral evolution of gene expression                      | Primates        |
| Xie [this paper] | P          | S | E | Evolution of gene regulatory networks                     | Yeasts, Mammals |

\* Only applied to two species.

1. Majoros WH, Ohler U (2010) Modeling the Evolution of Regulatory Elements by Simultaneous Detection and Alignment with Phylogenetic Pair HMMs. PLoS Comput Biol 6: e1001037.
2. He X, Ling X, Sinha S (2009) Alignment and Prediction of *cis*-Regulatory Modules Based on a Probabilistic Model of Evolution. PLoS Comput Biol 5: e1000299.
3. Holmes I, Bruno W (2000) Finding regulatory elements using joint likelihoods for sequence and expression profile data. Proc Int Conf Intell Syst Mol Biol 8: 202-210.
4. Wang W, Cherry JM, Botstein D, Li H (2002) A systematic approach to reconstructing transcription networks in *Saccharomyces cerevisiae*. Proceedings of the National Academy of Sciences of the United States of America 99: 16893-16898.
5. Bussemaker HJ, Li H, Siggia ED (2001) Regulatory element detection using correlation with expression. Nat Genet 27: 167-174.
6. Ihmels J, Bergmann S, Berman J, Barkai N (2005) Comparative gene expression analysis by differential clustering approach: application to the *Candida albicans* transcription program. PLoS genetics 1: e39.
7. Cai J, Xie D, Fan Z, Chipperfield H, Marden J, et al. (2010) Modeling Co-Expression across Species for Complex Traits: Insights to the Difference of Human and Mouse Embryonic Stem Cells. PLoS Comput Biol 6: e1000707.
8. Khaitovich P, Paabo S, Weiss G (2005) Toward a Neutral Evolutionary Model of Gene Expression. Genetics 170: 929-939.
