# Supplementary material for: Towards an Evolutionary Model of Transcription Networks
Source: PLOS journal article supplement (doi:10.1371/journal.pcbi.1002064), 2011-06-09
Supplement: S10 (10.1371/journal.pcbi.1002064.s010) [file journal.pcbi.1002064.s010]

Table S2: The regulatory relationship between TFa and three sets of genes in three species. The number of genes found in each set is given in parentheses.

| Phenotype | Genes<br>Species     | Regulated by TFa |          |          |
|-----------|----------------------|------------------|----------|----------|
|           |                      | rRNA (58)        | STR (73) | MRP (51) |
| anaerobic | <i>S. cerevisiae</i> | No               | Yes      | No       |
|           | <i>C. glabrata</i>   | No               | Yes      | No       |
| aerobic   | <i>C. albicans</i>   | No               | Yes      | Yes      |
